# Supplementary material for: The Set of Serine Peptidases of the <em>Tenebrio molitor</em> Beetle: Transcriptomic Analysis on Different Developmental Stages
Source: Preprints.org preprint supplement (doi:10.20944/preprints202404.1450.v1), 2024-04-23
Supplement: Supplementary file 1 [file supplementary]

## Sheet: Лист1
№	Name	NCBI ID (protein)	Preproenzyme/Mature Enzyme (aa)		SignalP (aa)	Regulatory domain	Propeptide cleavage site	Active site			S1 subsite			Annotation	Mm mature, Da	pI	TM (position)
1	SerPH427	CAH1378290	264	236	20	-	Q|INGG	D	N	E	G	I	S	SPH	26063	8.79	-
2	SerPH70	QRE01765	280	249	19	-	K|IVGG	H	D	D	D	G	G	SPH	27206.4	4.37	-
3	SerPH733	WJL97962	253	228	16	-	W|LHYS	H	D	D	S	C	M	SPH	25418.4	4.72	-
4	SerPH49	CAH1369791	258	234	18	-	R|IVGG	H	D	M	G	I	S	SPH	25612.4	4.4	-
5	SerPH53	CAH1369792	258	234	18	-	R|IVGG	H	D	M	G	I	S	SPH	25485.4	4.32	-
6	SerPH220	KAJ3632626	262	231	23	-	R|IIGG	H	D	N	G	I	S	SPH	25169.2	4.29	-
7	SerPH32	KAJ3632593	261	236	18	-	R|IIGG	H	D	N	G	I	S	SPH	26055.3	4.4	-
8	SerPH64	WJL97963	267	235	23	-	R|IIGG	H	D	N	G	I	S	SPH	26241.2	4.5	-
9	SerPH67	KAJ3632622	263	231	23	-	R|IIGG	H	D	N	G	I	S	SPH	26005.6	4.18	-
10	SerPH468	CAH1368201	268	234	24	-	R|IIGG	H	D	N	G	I	S	SPH	25665.6	4.6	-
11	SerPH467	CAH1368202	268	234	24		R|IIGG	H	D	N	G	I	S	SPH	25631.4	4.44	-
12	SerPH611	CAH1368200	265	235	24	-	R|IIGG	H	D	N	G	I	S	SPH	25843.9	4.56	-
13	SerPH147	CAH1365742	269	234	24	-	R|IING	H	D	N	G	I	S	SPH	25212.9	3.84	-
14	SerPH79	CAH1375498	262	235	16	-	R|IIGG	H	D	T	G	M	T	SPH	25169.3	4.72	-
15	SerPH122	CAH1368241	257	231	21	-	R|IIGG	H	D	T	G	L	S	SPH	25076	4.2	-
16	SerPH245	CAH1375497	262	233	16	-	R|IIGG	H	D	T	G	M	T	SPH	24657.7	4.64	-
17	SerPH342	KAJ3632571	269	235	17	-	R|IIGG	H	D	T	G	I	K	SPH	25491.7	4.62	-
18	SerPH395	KAJ3632570	269	235	16	-	R|IIGG	H	D	T	G	I	K	SPH	25387.5	4.35	-
19	SerPH486	CAH1375496	263	235	24	-	R|IIGG	H	D	T	G	F	S	SPH	25404.7	4.46	-
20	SerPH80	WJL97964	263	236	17	-	R|IIGG	H	D	T	G	I	S	SPH	26155.6	4.62	-
21	SerPH234	KAJ3632623	263	232	22	-	R|IIGG	L	D	N	G	I	S	SPH	25404.7	4.34	-
22	SerPH59	WJL97965	263	232	21	-	R|IIGG	N	D	N	G	I	S	SPH	25291.1	4.25	-
23	SerPH43	CAH1373500	279	257	16	-	R|IAGG	N	N	N	D	G	S	SPH	28285.4	6.84	-
24	SerPH497	WJL97966	252	224	19	-	R|VIGG	Q	D	A	G	A	D	SPH	23825.9	4.3	-
25	SerPH1020	CAH1380194	248	219	20	-	R|IMNG	M	D	M	A	S	D	SPH	23347.2	3.89	-
26	SerPH81	WJL97967	259	233	17	-	R|IIGG	Q	D	G	G	F	S	SPH	25204.3	4.46	-
27	SerPH250	CAH1365744	262	227	16	-	R|IING	Q	D	G	N	I	S	SPH	23916.7	3.92	-
28	SerPH1021	KAJ3638670	262	227	16	-	R|IING	Q	D	G	N	I	S	SPH	24047	3.68	-
29	SerPH237	CAH1365731	265	230	16	-	R|ILNG	Q	D	G	S	I	S	SPH	23870.8	4.22	-
30	SerPH239	ABC88745	265	230	16	-	R|ILNG	Q	D	G	S	I	T	SPH	23935	4.1	-
31	SerPH473	KAH0819850	268	237	16	-	R|IIGG	Q	D	I	G	I	T	SPH	25671.7	4.19	-
32	SerPH493	KAJ3632562	269	237	18	-	R|IIGG	Q	D	I	G	V	S	SPH	25743	4.27	-
33	SerPH115	KAJ3632565	264	236	13	-	R|IIGG	Q	D	I	G	L	S	SPH	25451.5	4.6	-
34	SerPH63	KAJ3632590	261	232	18	-	R|IIGG	Q	D	L	G	I	S	SPH	25022.9	4.26	-
35	SerPH128	KAH0821415	262	234	17	-	R|IVGG	Q	D	L	G	I	S	SPH	25543.6	4.22	-
36	SerPH139	KAJ3632573	268	235	16	-	R|IIGG	Q	D	L	G	I	S	SPH	25199.2	4.5	-
37	SerPH143	CAH1368222	264	235	18	-	R|IIGG	Q	D	L	G	I	S	SPH	25505.6	4.21	-
38	SerPH202	KAJ3632591	270	241	18	-	R|IIGG	Q	D	L	G	I	S	SPH	25710.9	4.11	-
39	SerPH207	KAJ3632577	262	234	17	-	R|IVGG	Q	D	L	G	I	S	SPH	25130.3	4.37	-
40	SerPH208	CAH1368225	262	234	17	-	R|IVGG	Q	D	L	G	I	S	SPH	25491.8	4.38	-
41	SerPH241	KAJ3632584	264	235	18	-	R|IIGG	Q	D	L	G	I	S	SPH	25344.3	4.15	-
42	SerPH474	WJL97968	280	235	17	-	R|IIGG	Q	D	L	G	I	S	SPH	25453.3	4.14	-
43	SerPH197	KAH0820594	280	235	17	-	R|IIGG	Q	D	L	G	I	S	SPH	25346.2	4.12	-
44	SerPH290	KAH0808032	255	232	16	-	R|IVGG	Q	D	M	G	R	S	SPH	24720.6	4.33	-
45	SerPH52	KAJ3632600	256	233	15	-	R|IIGG	Q	D	S	G	F	S	SPH	25262.1	4.34	-
46	SerPH51	KAJ3632618	267	236	15	-	R|IIGG	Q	D	S	G	I	S	SPH	25107.1	4.5	-
47	SerPH1006	KAJ3632617	262	231	20	-	R|IIGG	Q	D	S	G	I	S	SPH	24916.9	5.21	-
48	SerPH117	KAJ3632616	264	233	25	-	R|IIGG	Q	D	S	G	I	S	SPH	25036.1	5.09	-
49	SerPH142	CAH1368218	263	238	16	-	R|IFEG	Q	D	S	R	V	S	SPH	26185.2	4.3	-
50	SerPH162	CAH1365667	267	232	16	-	R|IISG	Q	D	S	G	S	Y	SPH	24744.5	4.55	-
51	SerPH204	KAJ3632602	261	235	15	-	R|IIGG	Q	D	S	G	F	S	SPH	25550.5	4.46	-
52	SerPH356	KAJ3632559	268	233	17	-	R|IIGG	Q	D	S	G	F	S	SPH	25022.2	4.26	-
53	SerPH384	KAJ3632603	258	237	20	-	R|IIGG	Q	D	S	G	I	S	SPH	25693.7	4.21	-
54	SerPH505	KAJ3632612	269	237	22	-	R|IIGG	Q	D	S	G	F	S	SPH	25589.5	4.47	-
55	SerPH546	WJL97969	263	233	24	-	R|IIGG	Q	D	S	G	F	S	SPH	24780.9	4.18	-
56	SerPH562	CAH1368228	275	235	23	-	R|IIGG	Q	D	S	G	I	S	SPH	25309.3	4.28	-
57	SerPH111	KAJ3632615	257	234	19	-	R|IIGG	Q	D	S	G	I	S	SPH	25491.1	4.34	-
58	SerPH196	WJL97970	265	238	17	-	R|IVGG	Q	D	S	G	I	S	SPH	25846.2	4.32	-
59	SerPH200	KAJ3620427	263	227	18	-	R|LIDG	Q	D	S	G	W	T	SPH	24644.4	4.57	-
60	SerPH23	KAJ3632605	267	236	21	-	R|VIGG	Q	D	T	G	I	S	SPH	25248.2	3.96	-
61	SerPH99	WJL97971	264	233	20	-	R|IIGG	Q	D	T	G	V	S	SPH	25324.2	4.46	-
62	SerPH126	KAH0818074	264	233	21	-	R|IIGG	Q	D	T	G	I	S	SPH	25576.7	4.26	-
63	SerPH130	WJL97972	264	233	20	-	R|IIGG	Q	D	T	G	I	S	SPH	25347.3	4.58	-
64	SerPH148	KAJ3632607	265	234	19	-	R|IIGG	Q	D	T	G	I	S	SPH	25762	4.33	-
65	SerPH160	CAH1369835	257	234	17	-	R|IVGG	Q	D	T	G	L	S	SPH	25408.5	4.5	-
66	SerPH231	WJL97973	264	233	21	-	R|IIGG	Q	D	T	G	I	S	SPH	25572.6	4.39	-
67	SerPH341	WJL97974	264	233	20	-	R|IIGG	Q	D	T	G	I	S	SPH	25291.2	4.41	-
68	SerPH93	WJL97975	264	233	18	-	R|IIGG	Q	D	T	G	I	S	SPH	25397	4.27	-
69	SerPH1003	CAH1368216	282	248	18	-	R|IIGG	Q	D	T	G	V	S	SPH	27076.3	4.8	-
70	SerPH136	KAJ3632606	264	234	17	-	R|IIGG	Q	D	T	G	L	S	SPH	25460.3	4.33	-
71	SerPH232	KAJ3632604	276	237	19	-	R|IIGG	Q	D	T	G	V	S	SPH	25531.6	4.22	-
72	SerPH149	ABC88750	272	241	16	-	R|IVGG	Q	D	V	G	I	T	SPH	26456.5	4.34	-
73	SerPH176	KAJ3626463	269	238	16	-	R|IVGG	Q	D	V	G	I	T	SPH	26034.2	4.25	-
74	SerPH181	WJL97976	259	234	20	-	R|IIGG	Q	D	V	G	L	S	SPH	25585	4.79	-
75	SerPH244	CAH1375491	269	238	16	-	R|IVGG	Q	D	V	G	I	T	SPH	25832.7	4.34	-
76	SerPH267	WJL97977	270	239	16	-	R|IIGG	Q	D	V	G	V	T	SPH	25972.8	3.85	-
77	SerPH358	CAH1375486	268	237	16	-	R|IVGG	Q	D	V	G	I	T	SPH	26255.4	4.28	-
78	SerPH222	ABC88752	269	238	16	-	R|IVGG	Q	D	V	G	I	T	SPH	26137.1	4.33	-
79	SerPH219	KAJ3632572	261	232	16	-	R|IIGG	S	D	V	G	I	S	SPH	24441.3	4.15	-
80	SerPH393	WJL97978	249	226	17	-	R|ILSD	S	D	S	G	G	D	SPH	24166.7	6.33	-
81	SerPH261	CAH1365751	256	223	16	-	R|IIGG	S	N	I	G	V	S	SPH	23751.3	4.07	-
82	SerPH391	WJL97979	263	227	16	-	R|IING	S	N	A	N	I	S	SPH	24291.1	4.07	-
83	SerPH95	KAJ3632596	270	237	16	-	R|IIGG	T	D	S	G	I	S	SPH	26106.2	4.41	-
84	SerPH273	CAH1369790	268	236	19	-	R|IIGG	T	D	S	G	V	S	SPH	25696.9	4.47	-
85	SerPH199	CAH1365747	265	230	16	-	R|IING	V	S	G	T	L	S	SPH	24762.9	4.29	-
86	SerPH90	KAJ3632594	268	236	17	-	R|IIGG	Y	D	T	G	I	S	SPH	26009.2	4.36	-
87	SerPH680	CAH1375940	290	246	20	-	Q|WTND	H	N	I	S	G	T	SPH	27892.6	9.23	-
88	SerPH1002	KAJ3632569	267	233	16	-	R|IIGG	H	N	I	G	L	S	SPH	25062.1	4.31	-
89	SerPH744	CAH1375484	264	230	16	-	R|IIAG	R	D	S	G	A	S	SPH	24806	3.87	-
90	SerPH485	WJL97980	296	255	17	-	R|MIKG	L	N	Y	G	I	E	SPH	28321	5.26	-
91	SerPH618	WJL97981	306	248	27	-	R|FMGG	S	D	G	V	Q	G	SPH	26579.3	4.89	-
92	SerPH1032	CAH1380364	250	-	22	-	-	S	D	R	N	K	E	SPH	-	-	-
93	SerPH1033	WJL97982	267	244	24	-	R|CSSN	H	D	E	R	Y	S	SPH	27262.5	8.85	-
94	SerPH1034	CAH1373571	312	281	17	-	K|CEAG	Q	N	E	E	E	K	SPH	31314.6	9.61	-
95	SerPH1036	CAH1376577	345	302	21	-	M|IDGN	T	D	S	Q	N	E	SPH	33758.7	4.31	-
96	SerPH1037	KAH0808835	246	-	20	-	-	R	G	S	G	S	T	SPH	-	-	-
97	SerPH542	CAH1377086	280	222	no	-	S|LQEH	H	N	Y	K	G	V	SPH	24685.4	9.26	7-29
98	SerPH556	KAJ3620428	266	233	18	-	R|IING	S	D	S	N	M	A	SPH	25252.9	4.13	-
99	SerPH541	CAH1365748	261	226	21	-	R|IING	Q	D	G	A	I	S	SPH	24037	3.67	-
100	SerPH213	KAJ3632609	260	235	20	-	R|IIGG	Q	D	V	G	L	S	SPH	25791	4.76	-
101	SerPH437	CAH1380402	265	239	21	-	R|IYGG	G	D	G	A	L	A	SPH	26030	4.4	-
102	SerPH1045	KAJ3617561	257	235	17	-	R|MIGG	H	D	G	A	L	A	SPH	25649	4.37	-
103	SerPH159	CAH1373087	391	253	22	Clip_A (57-85)	R|ILTP	H	D	G	D	G	A	SPH	28081	5.6	-
104	SerPH281	CAH1373100	366	246	17	Clip_A (42-90)	Q|SSSY	H	D	G	D	G	S	SPH	27034.6	9.65	-
105	SerPH216	QRE01766	348	254	16	Clip_A (13-66)	K|IGND	H	D	G	D	G	G	SPH	28298.2	6.1	-
106	SerPH164	KAJ3627136	355	260	20	Clip_A (24-65)	R|IIGD	H	D	G	D	G	G	SPH	28759.8	7.68	-
107	SerPH243	KAJ3627138	350	253	18	Clip_A (24-68)	I|GANG	H	D	G	D	G	A	SPH	28148	7.15	-
108	SerPH235	QRE01767	407	263	16	Clip_A (35-96)	K|ITGN	H	D	G	D	G	G	SPH	28786.8	5.98	-
109	SerPH236	KAJ3627133	407	263	16	Clip_A (35-96)	K|ITGN	H	D	G	D	G	G	SPH	28761.6	6.09	-
110	SerPH415	BAC15605	444	261	15	Clip_A (55-114)	N|LIGG	H	D	G	D	G	G	SPH	28675.7	6.09	-
111	SerPH296	KAJ3627135	387	249	30	Clip_A (255-286)	D|KGAN	H	D	G	G	S	H	SPH	27878.8	6.34	-
112	SerPH165	CAH1371357	387	260	21	Clip_A (63-100)	K|IKNP	H	D	G	D	G	G	SPH	29080.5	5.79	-
113	SerPH223	CAH1373089	400	264	21	Clip_A (65-104)	R|ITGN	H	D	G	D	G	G	SPH	29403.4	6.26	-
114	SerPH334	CAH1373104	360	249	22	Clip_A (42-78)	K|INPK	R	D	D	A	G	G	SPH	27762	8.33	-
115	SerPH36	KAJ3623435	714	245	19	Clip_A Masquerade (44-76, 149-181, 245-279, 298-333)	R|VVGG	H	D	G	D	G	G	SPH	26089.6	5.31	-
116	SerPH389	CAH1380739	1324	249	18	Clip_A (191-239); Clip_A_Scareface (946-1011)	P|GPGP	H	D	Y	D	D	G	SPH	27371.1	5.27	-
117	SerPH78	CAH1372746	1180	254	20	Clip_A (158-190)	R|IKNP	H	D	G	D	G	G	SPH	28489.3	5.83	-
118	SerPH544	CAH1363996	313	235	21	Clip_A (22-64)	P|QKGC	H	D	G	D	G	G	SPH	25466.1	9.32	-
119	SerPH203	WJL97983	377	259	16	Clip_B (24-78)	K|IVHG	H	D	G	D	G	A	SPH	28414.3	4.97	-
120	SerPH1005	CAH1363950	321	230	16	Clip_B (20-69)	K|CGLH	H	D	I	R	G	K	SPH	25685.5	7.16	-
121	SerPH312	KAJ3636685	360	252	20	Clip_B (47-84)	Q|IQGD	H	N	G	D	G	S	SPH	27612.3	6.31	-
122	SerPH515	CAH1374578	361	249	16	Clip_C (24-70)	R|IVGG	Q	D	S	D	G	A	SPH	27864.7	6.19	-
123	SerPH589	WJL97984	361	249	16	Clip_C (24-70)	R|IVGG	R	D	S	D	G	A	SPH	27672.3	5.85	-
124	SerPH570	WJL97985	694	233	no	SEA_domain (2-126), Frizzled (150-273), Ldl_a (319-365, 366-403)	T|VIGE	S	T	F	D	R	R	SPH	26345.7	5.8	41-63
125	SerPH364	CAH1369257	2382	253	no	SEA (358-429); EGF (475-519); Ldl_a (1828-1865, 1869-1901, 1905-1941, 1945-1981, 1982-2018); SRCR (2029-2120)	R|IIGG	S	D	E	D	R	R	SPH	28155	8.35	250-272
